# Supplementary material
Source: publisher figshare collection journal article supplement (https://karger.figshare.com/ndownloader/files/14099411)
Supplement: Supplementary file 1 [file 14099411]

## **Materials and Methods**

For this study, 17 hemifaces of embalmed cadavers of Spanish origin were dissected. The corpses included 11 men and 6 women between the ages of 53 and 79 years. These bodies had been donated legally to the Faculty of the Universidad Rey Juan Carlos. Before dissection, they were injected through the common carotid artery with latex (liquid latex rubber) containing a red dye to allow better visualization of the arterial pathway.

During the dissection, the skin and subcutaneous cellular tissue were removed until each artery was isolated in the facial path; simultaneously, each of the planes was photographed.
